1 **Crystal structure of monkeypox H1 phosphatase, an Antiviral Drug Target**

2

3 Wen Cui<sup>1,8</sup>, Haojun Huang<sup>1,8</sup>, Yinkai Duan<sup>2,8</sup>, Zhi Luo<sup>1</sup>, Haofeng Wang<sup>2</sup>, Tenan Zhang<sup>1</sup>,  
4 Henry Nguyen<sup>2</sup>, Wei Shen<sup>3</sup>, Dan Su<sup>1,4</sup>, Xiaoyun Ji<sup>1,5,\*</sup>, Haitao Yang<sup>2,6,7,\*</sup>, Wei Wang<sup>1,\*</sup>

5

6 <sup>1</sup>Institute of Life Sciences, Chongqing Medical University, Chongqing, China

7 <sup>2</sup>Shanghai Institute for Advanced Immunochemical Studies and School of Life Science and  
8 Technology, ShanghaiTech University, Shanghai, China

9 <sup>3</sup>School of Life Science and Technology, ShanghaiTech University, Shanghai, China

10 <sup>4</sup>State Key Laboratory of Biotherapy and Cancer Center, West China Hospital, Sichuan  
11 University and Collaborative Innovation Center of Biotherapy, Chengdu, China,

12 <sup>5</sup>State Key Laboratory of Pharmaceutical Biotechnology, Department of Biotechnology and  
13 Pharmaceutical Sciences, School of Life Sciences, Nanjing University, Nanjing, China

14 <sup>6</sup>Shanghai Clinical Research and Trial Center, Shanghai, China

15 <sup>7</sup>Tianjin International Joint Academy of Biotechnology and Medicine, Tianjin, China

16 <sup>8</sup>These authors contributed equally: Wen Cui, Haojun Huang, Yinkai Duan.

17 \*Corresponding author.

18 **Correspondence:** [xiaoyun.ji@nju.edu.cn](mailto:xiaoyun.ji@nju.edu.cn); [yanght@shanghaitech.edu.cn](mailto:yanght@shanghaitech.edu.cn);

19 [wangwei@cqmu.edu.cn](mailto:wangwei@cqmu.edu.cn)

20

21 **Abstract**

22       The current monkeypox outbreak has caused over 64,000 global cases, but the  
23 effective treatments are very limited. The dual specific phosphatase (H1) from  
24 monkeypox antagonizes the immune response and is crucial for viral replication,  
25 making it an attractive antiviral target. Here we determined a 1.8-Å crystal structure  
26 of H1, which forms a domain swapped dimer resembling a butterfly. Each active site,  
27 which consists of a Cys-Arg-Asp triad, captures a phosphate ion. The observed  
28 conformation mimics the final step of catalysis prior to product release. The crystal  
29 structure provides a strong foundation for the discovery of new antivirals against this  
30 emerging worldwide pathogen.

31

32           Since its appearance in May 2022, monkeypox has spread to more than 100  
33 countries and afflicted tens of thousands of people  
34 ([https://worldhealthorg.shinyapps.io/mpx\\_global/](https://worldhealthorg.shinyapps.io/mpx_global/)). Individuals infected with  
35 monkeypox present a fever, an extensive characteristic rash, and usually swollen  
36 lymph nodes<sup>1</sup>. The number of confirmed cases worldwide continues to grow at a  
37 rapid rate, but the treatment to this highly infectious viral disease is still very limited.  
38 Identification of new targeted-therapies will be crucial to control of this emerging  
39 public health threat.

40           The monkeypox virus is an enveloped double-stranded DNA virus that belongs  
41 to the *Orthopoxvirus* genus of the *Poxviridae* family<sup>2</sup>. It has a very large genome  
42 (~200 kilo base pairs) and codes around 200 proteins<sup>3</sup>. Poxviruses express a dual  
43 specific phosphatase (H1) that de-phosphorylates STAT1 and blocks interferon signal  
44 transduction<sup>4,5</sup>. H1 is conserved in poxviruses and is essential for virus replication in  
45 cell culture<sup>6</sup>. Inhibiting H1 expression results in greatly reduced infectivity. About  
46 200 copies of H1 are packaged into newly formed viral particles and function in the  
47 early stage of viral infection<sup>6</sup>. H1 has also been suggested to de-phosphorylate  
48 monkeypox proteins F18, A14 and A17<sup>6-8</sup>. Due to the importance of H1 in  
49 modulating interferon-signaling and viral replication, it serves as an attractive anti-  
50 poxvirus drug target.

51           To understand the mechanism for monkeypox H1 catalyzed dephosphorylation  
52 and provide an accurate structural model for drug discovery, we determined a crystal  
53 structure of H1 to 1.8 Å resolution (Fig. 1, Extended Data Table 1). Monkeypox H1  
54 has 171 amino acid residues and the refined model includes residues 2–171 with well-  
55 fitting electron density. There is one H1 molecule in an asymmetric unit. Two H1  
56 molecules are related by crystallographic symmetry and form a domain swapped  
57 dimer, which resembles a butterfly (Fig. 1a). The overall structure is composed of six  
58  $\alpha$  helices and four  $\beta$  strands. A four-stranded  $\beta$ -sheet is sandwiched by helices  $\alpha 2$  and  
59  $\alpha 3$ – $\alpha 6$  on either side. The active site is located near the C-terminus of the last  $\beta$ -  
60 strand. The two active sites are ~39 Å apart (Fig. 1a). There is a phosphate ion  
61 captured at each active site, representing the final stage of catalysis before the product  
62 is released.

63           The N-terminal helix  $\alpha 1$  from each protomer interchanges to mediate H1  
64 dimerization. The  $\alpha 1$  from one H1 protomer forms a four-helix bundle with three  
65 helices  $\alpha 4$ – $\alpha 6$  of the pairing protomer. The buried surface area between Protomer A  
66 and B is  $\sim 1000 \text{ \AA}^2$ , which is stabilized by both hydrophilic and hydrophobic  
67 interactions. Residues Ser14 and Thr15 in  $\alpha 1$  form hydrogen bonds with His143 and  
68 Tyr142/Lys159 of the other H1 protomer, respectively; whereas Tyr7, Leu11 and  
69 Leu12 participate in hydrophobic interactions with Met135, Leu139, Lys159, Ile163,  
70 Val167 and Ile168 from the pairing H1 molecule (Fig. 1b, upper panel). In addition,  
71 three residues in  $\alpha 5$ , Met135, Leu136 and Leu139, face the symmetry related residues  
72 in the dimer to expand the hydrophobic interface (Fig. 1b, middle panel).  $\alpha 1$  is also  
73 stabilized by intramolecular hydrogen bonds and hydrophobic interactions between  
74 residues of  $\alpha 1$  and  $\alpha 5$  (Fig. 1b, lower panel). Size exclusion chromatography  
75 confirms the H1 dimer in solution, suggesting that dimerization represents its  
76 functional state (Extended Data Fig. 1).

77           The H1 active site consists of a Cys-Arg-Asp catalytic triad (Fig. 2a). The  
78 conserved Cys and Arg residues are in a loop between  $\beta 4$  and  $\alpha 4$   
79 ( $^{109}\text{HCVAGVNRS}^{117}$ ), which is also known as the phosphate-binding loop. The  
80 arginine residue (Arg116) of this loop captures the phosphate ion, whose guanidinium  
81 group interacts with two phosphate oxygens through two hydrogen bonds with the  
82 distances of 2.9  $\text{\AA}$  and 3.0  $\text{\AA}$ , respectively (Fig. 2b). This important arginine residue  
83 guarantees efficient binding and orientation of the substrate. At the bottom of the  
84 catalytic pocket (Fig. 2c), the conserved Cys110 attacks the phosphorous atom during  
85 the de-phosphorylation reaction, resulting in a transient enzyme-phosphate  
86 intermediate. This intermediate is then hydrolyzed to generate inorganic phosphate  
87 and the regenerated enzyme. The sulfur atom of Cys110 is positioned in line with a  
88 phosphorous-oxygen (P-O) bond which corresponds to the one formed during the  
89 enzyme regeneration step (Fig. 2b). Asp79 is responsible for coordinating the water  
90 molecule, which is also hydrogen bonded to an oxygen from the phosphate group (Fig.  
91 2b). This residue functions as a general acid, facilitating both the formation of the  
92 enzyme-phosphate intermediate and its hydrolysis. Thus, the crystal structure  
93 represents the final step of catalysis before the product is released.

94           The high-resolution crystal structure of monkeypox H1 reveals at least two hot  
95 spots for drug discovery. The first hot spot is the dimer interface, which is unique  
96 among the members in the protein tyrosine phosphatase (PTP)/dual specificity  
97 phosphatase (DSP) family (Extended Data Fig. 2a). Blocking H1 dimerization may  
98 potentially inhibit its ability to dimerize and dephosphorylate the phosphor-tyrosine in  
99 activated signal transducer and activator of transcription 1 (STAT1), which is also a  
100 homodimer<sup>9,10</sup>. In addition, the active site is another potential target for inhibition.  
101 Although the active sites of all phosphatases in PTP/DSP family are built around a  
102 phosphate-binding loop (with a sequence HCX<sub>5</sub>R(S/T)) and have a similar main chain  
103 structure, the side chains around the active center are different<sup>10-12</sup> (Extended Data Fig.  
104 2b), which affects their own substrate specificity and may allow the development of  
105 specific inhibitors.

106           In conclusion, we report a high-resolution crystal structure of the monkeypox H1  
107 phosphatase that lays a solid foundation for its mechanistic study and the discovery of  
108 antiviral compounds against this emerging pathogen.

109

110 **Fig. 1 | Monkeypox H1 forms a domain swapped dimer. a**, The overall structure of  
111 H1 dimer, shown in two different views. Two protomers are in yellow and blue,  
112 respectively. The secondary structure elements are labeled. The two active sites are on  
113 the same side of the dimer and  $\sim 39$  Å apart. There is a phosphate ion in each active  
114 site. **b**, Zoom in of the dimer interface, which consists three components. The residues  
115 that participate in dimerization are shown as stick models. Hydrogen bonds are shown  
116 as dashed lines.

117 **Fig. 2 | The active center of H1 captures the final step of catalysis before the**  
118 **product is release. a**, The active site is located near the C-terminus of  $\beta 4$ , which  
119 consists of a phosphate binding loop (between  $\beta 4$  and  $\alpha 4$ ) and a general acid loop  
120 (between  $\beta 3$  and  $\alpha 3$ ). The Cys-Arg-Asp catalytic triad and the phosphate ion in active  
121 site are shown as stick models. Water is presented as a red sphere. **b and c**, Zoom in  
122 of the active site, where H1 is in cartoon and surface representations, respectively.  
123 Hydrogen bonds are shown as dashed lines. The distances between the hydrogen  
124 bonded atoms are labeled. Simulated annealing omit map is shown for the phosphate  
125 ion and the water molecule. The map is generated with the standard composite omit  
126 map procedure implemented in Phenix (torsion angle simulated annealing with 5% of  
127 model omitted at a time).

## 128 **Methods**

129 **Cloning, protein expression and purification of monkeypox H1.** The DNA  
130 coding for monkeypox H1 of the current monkeypox virus (MPXV) outbreak (isolate  
131 name MPXV\_USA\_2022\_MA001; accession ON563414 in GenBank) was synthesized  
132 by Tsingke Biotech (China) and cloned into the pETDuet-1 expression vector using  
133 restriction sites *EcoRI* and *NdeI*, coding proteins with a N-terminal His-tag. The plasmid  
134 was verified by sequencing (Tsingke Biotech, China).

135 H1 was expressed in *Escherichia coli* BL21(DE3) in Luria broth (LB) at 16 °C for  
136 16-18 h with 0.5 mM IPTG. Bacteria expressing H1 were harvested and resuspended in a  
137 lysis buffer containing 20 mM Tris-HCl, pH 8.0, 0.5 M NaCl, 10 mM imidazole, 5 mM  
138 MgCl<sub>2</sub> and 10% glycerol and lysed by high pressure homogenization. After  
139 centrifugation (16,000 x g, 30 min at 4 °C), the supernatant was loaded onto a Ni-NTA  
140 column (GE Healthcare, USA). The column was washed using a buffer containing 20  
141 mM Tris-HCl, pH 8.0, 0.2 M NaCl, 50 mM imidazole, 5 mM MgCl<sub>2</sub> and 10% glycerol  
142 and eluted using a similar buffer supplemented with 250 mM imidazole. The eluted  
143 protein was concentrated and purified by gel-filtration chromatography (Superdex 200  
144 10/300 GL, GE Healthcare, USA), using a buffer containing 20 mM Tris-HCl, pH 8.0,  
145 500 mM NaCl and 5 mM MgCl<sub>2</sub>.

146 **Crystallization, data collection and structure determination.** Crystals were  
147 grown by the sitting-drop vapor diffusion method. H1 was crystallized at 16 °C by  
148 mixing 1 μL protein (15 mg/mL) with 1 μL crystallization buffer containing 0.2 M  
149 Li<sub>2</sub>SO<sub>4</sub>, 0.1 M Bis-Tris pH 6.5 and 25% polyethylene glycol 3,350. The crystals were  
150 cryoprotected using the crystallization buffer supplied with 20% glycerol. X-ray  
151 diffraction data were collected on beamline BL18U1 at the Shanghai Synchrotron  
152 Radiation Facility at 100 K and at a wavelength of 0.97776 Å. Data integration and  
153 scaling were performed using XDS<sup>13</sup>. The structure was determined by molecular  
154 replacement method with the AutoSol program in PHENIX<sup>14</sup> using the structure of  
155 Vaccinia Virus H1 (PDB: 3CM3) as a search model. The H1 model was initially built by  
156 the Autobuild program in PHENIX and subsequently subjected to iterative cycles of  
157 manual building in Coot<sup>15</sup> and refinement in PHENIX.

158           **Structural comparison with human phosphatases in the PTP/DSP family.** The  
159 coordinates of monkeypox H1 was uploaded on DALI server<sup>16</sup> and search for proteins  
160 with similar structure in Protein Data Bank (using the PDB50 subset). 30 phosphatase  
161 structures were found to have a Z-score higher than 13.0, which indicates significant  
162 structural similarity. Among them, two human phosphatases are crystalized as dimer:  
163 human dual-specificity phosphatase 5 (hDSP5, PDB ID: 2G6Z) and human dual-  
164 specificity phosphatase 27 (hDSP27, PDB ID: 2Y96). Their dimerization mode was  
165 compared.

166

- 167 1       Chatterjee, S. *et al.* Relooking the monkeypox virus during this present  
168 outbreak: epidemiology to therapeutics and vaccines. *Eur Rev Med*  
169 *Pharmacol Sci* **26**, 5991-6003, doi:10.26355/eurrev\_202208\_29541 (2022).
- 170 2       Isidro, J. *et al.* Phylogenomic characterization and signs of microevolution in  
171 the 2022 multi-country outbreak of monkeypox virus. *Nat Med* **28**, 1569-  
172 1572, doi:10.1038/s41591-022-01907-y (2022).
- 173 3       Kugelman, J. R. *et al.* Genomic variability of monkeypox virus among humans,  
174 Democratic Republic of the Congo. *Emerg Infect Dis* **20**, 232-239,  
175 doi:10.3201/eid2002.130118 (2014).
- 176 4       Najarro, P., Traktman, P. & Lewis John, A. Vaccinia Virus Blocks Gamma  
177 Interferon Signal Transduction: Viral VH1 Phosphatase Reverses Stat1  
178 Activation. *J Virol* **75**, 3185-3196, doi:10.1128/JVI.75.7.3185-3196.2001  
179 (2001).
- 180 5       Mann, B. A. *et al.* Vaccinia Virus Blocks Stat1-Dependent and Stat1-  
181 Independent Gene Expression Induced by Type I and Type II Interferons. *J*  
182 *Interferon Cytokine Res* **28**, 367-380, doi:10.1089/jir.2007.0113 (2008).
- 183 6       Liu, K., Lemon, B. & Traktman, P. The dual-specificity phosphatase encoded  
184 by vaccinia virus, VH1, is essential for viral transcription in vivo and in vitro. *J*  
185 *Virol* **69**, 7823-7834, doi:10.1128/jvi.69.12.7823-7834.1995 (1995).
- 186 7       Traktman, P. *et al.* Elucidating the Essential Role of the A14 Phosphoprotein  
187 in Vaccinia Virus Morphogenesis: Construction and Characterization of a  
188 Tetracycline-Inducible Recombinant. *J Virol* **74**, 3682-3695,  
189 doi:10.1128/JVI.74.8.3682-3695.2000 (2000).
- 190 8       Derrien, M., Punjabi, A., Khanna, M., Grubisha, O. & Traktman, P. Tyrosine  
191 Phosphorylation of A17 during Vaccinia Virus Infection: Involvement of the  
192 H1 Phosphatase and the F10 Kinase. *J Virol* **73**, 7287-7296,  
193 doi:10.1128/JVI.73.9.7287-7296.1999 (1999).
- 194 9       Wenta, N., Strauss, H., Meyer, S. & Vinkemeier, U. Tyrosine phosphorylation  
195 regulates the partitioning of STAT1 between different dimer conformations.  
196 *Proc Natl Acad Sci U S A* **105**, 9238-9243, doi:10.1073/pnas.0802130105  
197 (2008).



- 198 10 Jeong, D. G. *et al.* The family-wide structure and function of human dual-  
199 specificity protein phosphatases. *Acta Crystallogr D Biol Crystallogr* **70**, 421-  
200 435, doi:10.1107/S1399004713029866 (2014).
- 201 11 Tao, X. & Tong, L. Crystal structure of the MAP kinase binding domain and the  
202 catalytic domain of human MKP5. *Protein Sci* **16**, 880-886,  
203 doi:10.1110/ps.062712807 (2007).
- 204 12 Yuvaniyama, J., Denu, J. M., Dixon, J. E. & Saper, M. A. Crystal Structure of the  
205 Dual Specificity Protein Phosphatase VHR. *Science* **272**, 1328-1331,  
206 doi:10.1126/science.272.5266.1328 (1996).
- 207 13 Otwinowski, Z. & Minor, W. Processing of X-ray diffraction data collected in  
208 oscillation mode. *Methods Enzymol* **276**, 307-326 (1997).
- 209 14 Adams, P. D. *et al.* PHENIX: a comprehensive Python-based system for  
210 macromolecular structure solution. *Acta Crystallogr. D Biol. Crystallogr.* **66**,  
211 213-221, doi:10.1107/S0907444909052925 (2010).
- 212 15 Emsley, P., Lohkamp, B., Scott, W. G. & Cowtan, K. Features and development  
213 of Coot. *Acta Crystallogr. D Biol. Crystallogr.* **66**, 486-501, doi:  
214 10.1107/S0907444910007493 (2010).
- 215 16 Holm, L. Dali server: structural unification of protein families. *Nucleic Acids*  
216 *Res* **50**, W210-W215, doi:10.1093/nar/gkac387 (2022).
- 217

## 218 **Data availability**

219 Coordinates and structure factors for Monkeypox virus H1 has been deposited in Protein  
220 Data Bank (PDB) with accession number 8GZ4.

## 221 **Acknowledgements**

222 We are grateful to the staff at the BL18U1 at Shanghai Synchrotron Radiation Facility  
223 (SSRF, China), where data was collected. This work was supported by grants from the  
224 National Natural Science Foundation of China (81902063, 81871639, 92169109) and  
225 National Key R&D Program of China (2018YFA0507100, 2020YFA0707500). This  
226 work was supported by the Natural Science Program of Chongqing Science and  
227 Technology Commission (cstc2019jcyj-msxmX0135), Science and Technology Research  
228 Program of Chongqing Municipal Education Commission (KJQN202000442) and  
229 CQMU Program for Youth Innovation in Future Medicine (W0073) to W.W. This work  
230 was supported by grants from Lingang Laboratory (LG202101-01-07), Science and  
231 Technology Commission of Shanghai Municipality (YDZX20213100001556 and  
232 20XD1422900), Natural Science Foundation of Tianjin (18JCJQC48000) and Shanghai  
233 Municipal Science and Technology Major Project (ZD2021CY001) to H.Y. This work

234 was supported by Shanghai Frontiers Science Center for Biomacromolecules and  
235 Precision Medicine, ShanghaiTech University.

236 **Author contributions**

237 H.Y. and W.W. conceived the project; W.C., H.Y. and W.W. designed the experiments;  
238 W.C., H.H., Z.L., and T.Z., cloned, expressed, purified and crystallized proteins; Y.D.  
239 and H.W. collected the diffraction data; W.C., Y.D., H.W. and X.J. solved the crystal  
240 structure; H.H., W.C., Y.D., W.S., D.S., X.J., W.W. and H.Y. analyzed and discussed the  
241 data; H.N., X.J., W.W. and H.Y. wrote the manuscript.

242 **Competing interests**

243 The authors declare no competing interests.

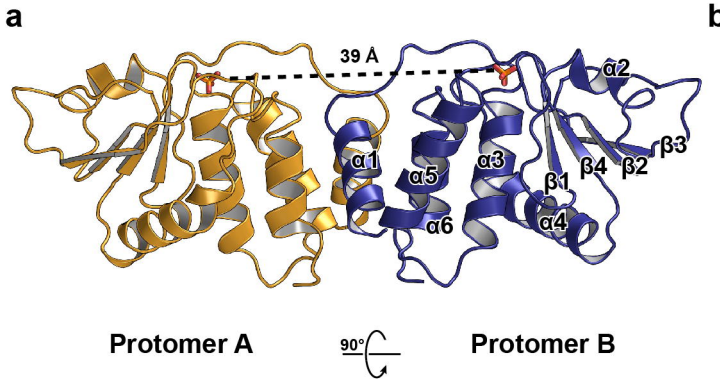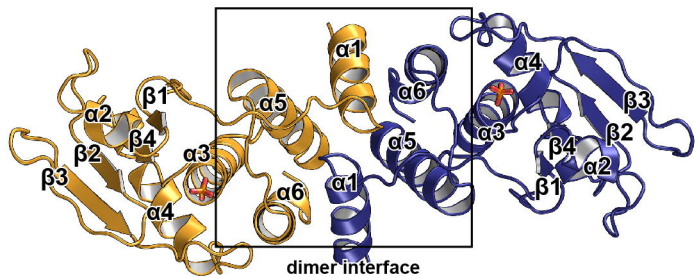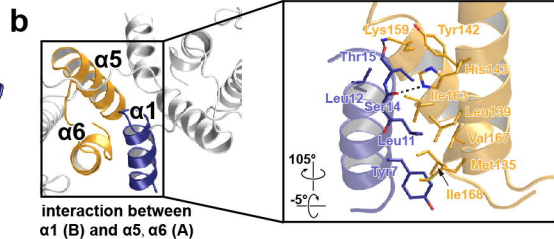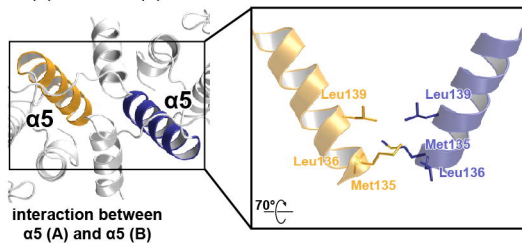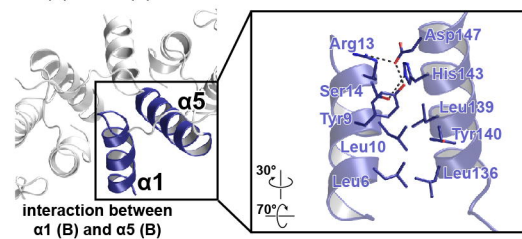

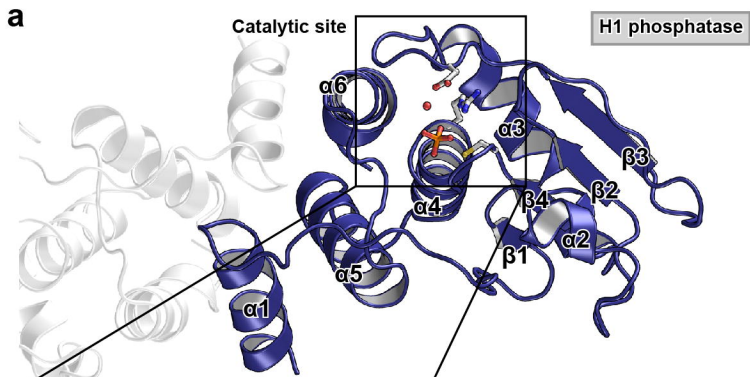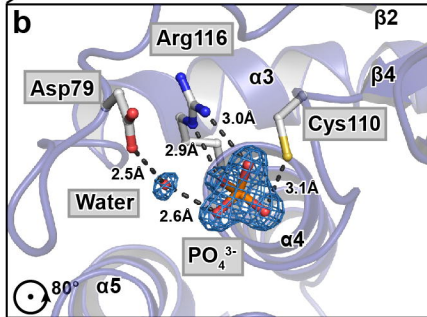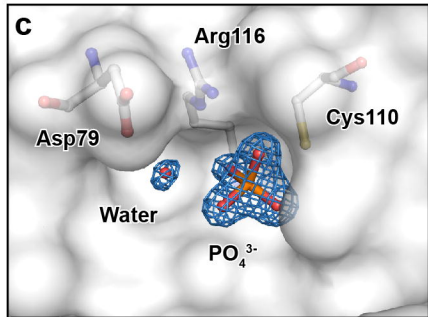

Source: https://www.biorxiv.org/content/10.1101/2022.09.30.510410v1.full.pdf
